# Supplementary material for: Young Bone Marrow Sca-1 Cells Rejuvenate the Aged Heart by Promoting Epithelial-to-Mesenchymal Transition
Source: PubMed Central journal article supplement — Theranostics. 2018 Feb 12;8(7):1766–81. doi: 10.7150/thno.22788 (PMC5858499; doi:10.7150/thno.22788), 2018-02-12
Supplement: thnov08p1766s1.pdf [file thnov08p1766s1.pdf]

## **SUPPLEMENTAL MATERIAL**

**for**

### **Young Bone Marrow Sca-1 Cells Rejuvenate the Aged Heart by Promoting Epithelial-to-Mesenchymal Transition**

Jiao Li<sup>1,2,3</sup>, Shu-Hong Li<sup>2</sup>, Jun Wu<sup>2</sup>, Richard D. Weisel<sup>2,3</sup>, Alina Yao<sup>2</sup>, William L. Stanford<sup>4</sup>, Shi-Ming Liu<sup>1#</sup>, Ren-Ke Li<sup>2,3#</sup>

<sup>1</sup>Department of Cardiology, Second Affiliated Hospital of Guangzhou Medical University, Guangzhou, China

<sup>2</sup>Toronto General Research Institute, Division of Cardiovascular Surgery, University Health Network, Toronto, Canada

<sup>3</sup>Division of Cardiac Surgery, Department of Surgery, University of Toronto; Toronto, Canada

<sup>4</sup>Regenerative Medicine Program, Ottawa Hospital Research Institute, Department of Cellular and Molecular Medicine, University of Ottawa

## Supplemental Methods

### *Animal procedures*

The Animal Care Committee of the University Health Network approved all experimental procedures, which were carried out according to the Guide for the Care and Use of Laboratory Animals (NIH, revised 2011).

Sca-1<sup>+</sup> and Sca-1<sup>-</sup> BM cells from young (Y) GFP transgenic mice were used to reconstitute irradiated old (O) wild type recipient mice, generating Y(Sca1<sup>+</sup>)-O and Y(Sca1<sup>-</sup>)-O chimeras (Figure S1A). BM of C57BL/6-Tg-GFP mice aged 2–3 months was flushed from the tibias and femurs and mononuclear cells were separated by density gradient centrifugation, and then separated into Sca-1<sup>+</sup>- and Sca-1<sup>-</sup>-labeled fractions by immunomagnetic activated cell sorting following the manufacturer's instruction (Stem Cell Technology, Cat#: 18756). The purity of positive cells was confirmed by flow cytometry. Female C57BL/6 mice aged 20–22 months [old (O) recipients] were lethally irradiated (9.5 Gy) and immediately received an infusion (through the tail vein) of fresh Sca-1<sup>+</sup> or Sca-1<sup>-</sup> BM cells ( $2 \times 10^6$ ) from young (Y) donor mice, generating Y (Sca-1<sup>+</sup>)-O chimeras and Y(Sca-1<sup>-</sup>)-O chimeras. Male Sca-1 knockout (KO) mice (C57BL/6 background) and their WT littermates aged 2–3 months were used in this study. Sca-1 KO mice were kindly provided by Dr William L. Stanford [1] and reconstituted with WT BM Sca-1<sup>+</sup> cells as described above.

### *Epicardium-derived cell culture*

EPDCs isolated from 20–22 month old mice were cultured as previously described [2, 3]. Briefly, hearts were removed aseptically from mice, and washed with ice-cold nominally

calcium-free KH buffer. After rinsing, hearts were placed in 0.25% trypsin-EDTA (1 mM) at room temperature. After 20 min, the epicardial surface of the heart was gently scraped, and the resulting cells were suspended in Dulbecco's Modified Eagle's Medium (DMEM) plus 10% fetal calf serum. The medium was changed after 1 h to remove non-attached cells and subsequently every 3 days. The purity of EPDCs was confirmed by immunofluorescent staining of WT1 (wilms tumor 1, a specific marker for epicardial cells). Cells in passage 2 were used for the experiments.

### ***Hypoxia conditions and co-culture studies***

EPDCs were isolated and co-cultured with bone marrow (BM) Sca-1<sup>+</sup> cells or Sca-1<sup>-</sup> cells under normoxia and hypoxia (0.1% O<sub>2</sub>) conditions. To test cell proliferation, MTT [3-(4,5-dimethylthiazol-2-yl)-2, 5-diphenyl-tetrazolium bromide, Sigma, Cat#: M2128] assay and BrdU (5-bromo-2'-deoxyuridine) labeling were carried out. For MTT assay, co-culture was carried out under hypoxia condition for 1, 3, 5, 7 days respectively. For BrdU labeling, EPDCs were co-cultured with BM Sca-1<sup>+</sup> cells or Sca-1<sup>-</sup> cells under normoxia and hypoxia conditions for 72 h with BrdU (10μM) for labeling of proliferative cells. Cell migration was evaluated by the transwell and wound-scratch assays after co-culture for 24 h. To test the changes in EMT related genes and proteins, co-culture was carried out for 72 h.

For the co-culture studies, two transwell systems were used. For the transwell system used to investigate EPDC migration, Young Sca1<sup>+</sup> or Sca1<sup>-</sup> BM cells (1x10<sup>5</sup>/cm<sup>2</sup>) in serum-free DMEM medium were cultured in the lower compartment. EPDCs (2x10<sup>4</sup>/cm<sup>2</sup>) were plated in the transwell cell culture inserts (8-μm diameter pores). For all the other assays related to co-culture (MTT assay, BrdU labeling, RT-qPCR, immunostaining, Western blot), young BM Sca1<sup>+</sup> or

Sca1<sup>-</sup> cells ( $1 \times 10^5/\text{cm}^2$ ) in serum-free DMEM medium were plated in the transwell cell culture inserts (1- $\mu\text{m}$  diameter pores). EPDCs ( $2 \times 10^4/\text{cm}^2$ ) were cultured in the lower compartment.

### ***Cell proliferation assay***

EPDCs isolated from 20–22 month old mice were seeded into 96-well plates ( $4 \times 10^3/\text{well}$ ), and co-cultured with young Sca1<sup>+</sup> or Sca1<sup>-</sup> BM cells ( $2 \times 10^4/\text{well}$ ) in serum-free DMEM medium under normoxia and hypoxia (0.1% O<sub>2</sub>) conditions. An MTT assay was used to detect viable proliferating cells at 1, 3, 5, and 7 days after co-culture. The assay was normally carried out in half-area flat-bottomed microtitre trays. Each well contained the cells to be tested with the culture medium removed. Supernatant removal was accomplished by inverting, flicking and blotting the plate. To the cells in each well added 50ul of 1mg/ml solution of MTT in PBS. The tray was gently shaken and incubated for 3–4h at 37<sup>0</sup>C. Then remove the untransformed MTT carefully, add propanol 50ul to each well. The optical density of each well was measured using an automatic plate reader with a 560 nm test and a 690 nm reference wavelength. For BrdU staining, the serum-free DMEM medium was supplemented with BrdU (10  $\mu\text{M}/\text{mL}$ ). After co-culture with young Sca1<sup>+</sup> or Sca1<sup>-</sup> BM cells under normoxia and hypoxia conditions for 72 h, the cells were fixed for immunofluorescent staining with BrdU (Abcam, Cat#: ab6326).

### ***Cell migration assay***

Wound-scratch and transwell assays were used to investigate EPDC migration. Briefly, EPDCs isolated from 20–22 month old mice were passed into the wells ( $2 \times 10^4/\text{cm}^2$ ). After a scratch was created with a p200 pipette tip, cell debris was removed. Young Sca1<sup>+</sup> or Sca1<sup>-</sup> BM cells ( $1 \times 10^5/\text{cm}^2$ ) in serum-free DMEM medium were added to the well. After 24 h in normoxia

and hypoxia conditions, images were obtained using a microscope (Nikon Eclipse Ti) after washing. The transwell system was also used to investigate EPDC migration. Young Sca1<sup>+</sup> or Sca1<sup>-</sup> BM cells ( $1 \times 10^5/\text{cm}^2$ ) in serum-free DMEM medium were cultured in the lower compartment. EPDCs ( $2 \times 10^4/\text{cm}^2$ ) were plated in the transwell cell culture inserts (8- $\mu\text{m}$  diameter pores). After 24 h in normoxia and hypoxia conditions, cells on the upper layer of the insert membrane were completely removed by a cotton swab. EPDCs that migrated to the other side of the membrane were fixed and stained with 0.5% crystal violet.

### ***Real-Time Reverse Transcription-Polymerase Chain Reaction***

Total RNA was isolated with TRIzol reagent (Invitrogen, Grand Island, NY) and cDNA was synthesized using Moloney murine leukemia virus reverse transcriptase and random primers. Real-time polymerase chain reaction was conducted using SensiFAST SYBR Green PCR Master Mix (Bioline USA Inc., Taunton, MA) with the following parameters: 95° 2 min; [95° 5 s; 60° 30 s for 40 cycles]. The oligonucleotide primer sequences are shown in Table S1.

### ***In vitro EMT induction***

Young Sca1<sup>+</sup> or Sca1<sup>-</sup> BM cells ( $1 \times 10^5/\text{cm}^2$ ) in serum-free DMEM medium were co-cultured with EPDCs isolated from 20–22 month old mice ( $2 \times 10^4/\text{cm}^2$ ) under normoxia and hypoxia conditions to induce EMT. After 72h, the mesenchymal and epithelial markers of EPDCs were detected. The medium was supplemented with growth factors TGF- $\beta$ 1 (5 ng/ml, R&D system, Cat#: 7754-BH) or TGF- $\beta$ 1 blocker MAB 240 (1  $\mu\text{g/mL}$ ) [R&D Systems Inc., Minneapolis, MN] in the experiments indicated in the Results section.

### ***Immunofluorescent staining***

Hearts were fixed in 2% paraformaldehyde (PFA) for 24 h after being well perfused with PFA and were then stored in 0.5M sucrose at 4 °C overnight. Hearts were then embedded with OCT, and 5- $\mu$ m-thick frozen sections were prepared. Slides were incubated with one of the following primary antibodies: Alexa488 conjugated anti-GFP (Invitrogen, Cat#: A21311, 1:400) or Goat anti-GFP (Abcam, Cat#: ab6673, 1:400), anti- $\alpha$ -SMA (Sigma, Cat#: A-2547, 1:400), anti-Calponin (Abcam, Cat#: ab46794, 1:100), anti-ZO1 (Abcam, Cat#:59720, 1:100), anti-Vimentin (Abcam, Cat#:11256, 1:100), anti-WT1 (Santa Cruz, Cat#: SC-192, 1:100), anti-BrdU (1:80; Abcam, Cat#: ab6326) at room temperature for 2 h. Incubation with respective Alexa 488 or 568 or 647 conjugated secondary antibodies (Invitrogen, all 1:400) was carried out at room temperature with light protection for 1 h. The nuclei were identified with DAPI. The number of positive cells in 6 randomly selected high-power fields per section was determined and quantified as % out of total cells (DAPI<sup>+</sup>) in the corresponding high-power fields, then averaged for 6 sections (6 mouse hearts) with a Nikon fluorescent microscope. An Olympus Fluoview 2000 laser scanning confocal microscope was used to confirm the co-localization of fluorescent signals. To detect cell proliferation after MI, BrdU (50 mg/kg, Sigma) was administered to mice by intraperitoneal injection for 3 consecutive days. Coronary artery ligation was performed 1 day later.

### ***Flow Cytometry Analysis***

BM of C57BL/6-Tg-GFP mice aged 2–3 months was flushed from the tibias and femurs and mononuclear cells were separated by density gradient centrifugation, and then separated into Sca-1<sup>+</sup> and Sca-1<sup>-</sup> fractions by immunomagnetic activated cell sorting following the

manufacturer's instruction (Stem Cell Technology, Cat#: 18756). The cells were resuspended in PBS supplemented with 2% FBS and 0.1% sodium azide. One million cells were taken for antibody staining (all 1:100 dilution) of APC anti-mouse/human CD11b (Biolegend, Cat#:10211), APC anti-mouse CD31 (Biolegend, Cat#:102509), APC anti-mouse CD45 (Biolegend, Cat#:103112), APC anti-mouse/human CD44 (Biolegend, Cat#:103011), Alexa647 anti-mouse CD34 (Biolegend, Cat#:152205), Rb pAb to CD105 (Abcam, Cat#:ab107595), Purified Anti-Mouse CD90.2 (eBioscience, Cat#:14-0902-81), c-Kit (M-14) goat pyclonal IgG (Santa Cruz, Cat#: SC-1494), PDGFR $\beta$  (958) rabbit polyclonal IgG (Santa Cruz, Cat#: SC-432), CD90.1 PE-Cy5 (eBioscience, Cat#:15-0900-82), anti-Flk-1 affinity purified goat IgG (R&D, Cat#: AF644), mAb anti-Integrin beta1/CD29 (Abcam, Cat#: ab179471). All antibody incubation was carried out for 30 min at 4°C in the dark. Alexa647-conjugated donkey anti-rabbit, or chicken anti-goat (Invitrogen, all 1:400) was added for staining with mouse cKit, Flk-1, CD29, CD105, PDGFR $\beta$  respectively. Isotype-identical IgG served as controls (Becton Dickinson). Cells were analyzed using a Becton Dickinson LSRII flow cytometer. The fluorescence intensity of 10,000 cells for each sample was quantified.

### ***Western blotting***

For Western blotting, 50  $\mu$ g of lysate was fractionated through a 4% stacking and 10% running SDS-PAGE gel, and the fractionated proteins were transferred to a PVDF membrane. Blots were blocked for 1 h at room temperature with blocking buffer. The antibodies ( $\alpha$ -SMA, calponin, and vimentin, all 1:1000) reacted with the blots overnight at 4°C. After washing (3 x 5 min in 1xTBS-0.1% Tween 20), the blots were incubated with horseradish peroxidase-conjugated secondary antibody at 1:2000 dilution for 1 h at room temperature. Visualization was performed

with enhanced chemiluminescence. For quantification, densitometry of the target bands was divided by the corresponding densitometry of the GAPDH (Millipore, Cat#: mab374, 1:5000) band using AlphaImager 2200 software.

### ***Enzyme-linked Immunosorbent Assay (ELISA)***

Young Sca1<sup>+</sup> or Sca1<sup>-</sup> BM cells were cultured in serum-free DMEM medium under normoxia and hypoxia conditions for 72 h. The supernatant and cells were collected and protein concentration was determined using a Bio-Rad DC protein assay kit. The level of TGF- $\beta$ 1 (R&D Systems, Cat#: mb100b) was determined using ELISA following the manufacturer's instruction.

**Table S1. Oligonucleotide primer sequences**

| Gene name      | Forward primer           | Reverse primer          |
|----------------|--------------------------|-------------------------|
| Snail          | ACATCCGAAGCCACACG        | GTCAGCAAAAGCACGGTTG     |
| Slug           | ACACATTAGAACTCACACTGGG   | TGGAGAAGGTTTTGGAGCAG    |
| Krt14          | CAAAGACTACAGCCCCTACTTC   | TCTGCTCCGTCTCAAACCTG    |
| BVES           | GAACAGTATCACCAGCTCCAG    | CTTCTACCCCTTCCTCGATTG   |
| Calponin       | GAAGGTCAATGAGTCAACTCAGAA | CCATACTTGGTAATGGCTTTGA  |
| Cdh6           | GATCCGATTATCAGTACGTGGG   | TGTATGTCGCCTGTGTTCTC    |
| Col7a1         | GCCTAGCACCTCTTATCAAGTC   | CAGGTGATGCTGACAGATGAG   |
| WT1            | ATGACCTCCCAGCTTGAATG     | GTTCTCACTCTCATACCCTGTG  |
| Tbx18          | GGAGTCATACGCATTCTGGAG    | CAGGTGAGGATGTGTAGCAG    |
| TGF- $\beta$ 1 | CCTGAGTGGCTGTCTTTTGA     | CGTGGAGTTTGTTATCTTTGCTG |
| Pdgfa          | TTAACCATGTGCCCCGAGAAG    | ATCAGGAAGTTGGCCGATG     |
| Pdgfb          | CACCGAAAGTTTAAGCACACC    | CATTATCACTCCAAGGACCCC   |
| Fgf1           | TGGGACAAGGGACAGGAG       | TCCTCATTTGGTGTCTGCG     |
| Fgf2           | TCTACTGCAAGAACGGCG       | CTCCCTTGATAGACACAACCTCC |
| Vegfa          | GGCAGCTTGAGTTAAACGAAC    | TGGTGACATGGTTAATCGGTC   |
| Vegfc          | CAGCCCACCCCTCAATACC      | CTCCTTCCCCACATCTATACAC  |
| Igf1           | CCCCACTGAAGCCTACAAAAG    | TCACCTTTCCTTCTCCTTTGC   |
| SCF            | TCAAGAGGTGTAATTGTGGACG   | GGGTAGCAAGAACAGGTAAGG   |

### Supplemental Figure Legends

**Figure S1. Overall experimental design.** (A) Schematic diagram of bone marrow (BM) reconstitution. Sca-1<sup>+</sup> and Sca-1<sup>-</sup> BM cells from young (Y) GFP (green fluorescent protein) transgenic mice were used to reconstitute irradiated old (O) wild type mice, generating Y(Sca1<sup>+</sup>)-O and Y(Sca1<sup>-</sup>)-O chimeras, respectively. (B) Schematic diagram of experimental design. To detect cell proliferation after myocardial infarction (MI), BrdU (5-bromo-2'-deoxyuridine, 50 mg/kg) was administered to mice by intraperitoneal injection for 3 consecutive days. Coronary artery ligation was performed 1 day later. BM cell homing, epicardial cell activation, and cell proliferation were measured 3 and 7 days post-MI. The epithelial-to-mesenchymal transition (EMT) process of epicardial cells was evaluated 3 days post-MI.

**Figure S2. Characterization of Sca-1<sup>+</sup> and Sca-1<sup>-</sup> bone marrow cells.** Bone marrow (BM) of C57BL/6-Tg-GFP mice aged 2–3 months was separated into Sca-1<sup>+</sup> and Sca-1<sup>-</sup> fractions by immunomagnetic activated cell sorting. The GFP<sup>+</sup>Sca-1<sup>+</sup> (A) and the GFP<sup>+</sup> Sca-1<sup>-</sup> (B) BM cells were characterized with the hematopoietic lineage markers (CD45, CD44, CD11b, cKit, CD34, CD90.1), mesenchymal lineage markers (CD105, CD29, CD90.2), endothelial progenitor markers (Flk-1), endothelial marker (CD31) and pericyte marker (PDGFR $\beta$ ). The number of cKit<sup>+</sup> or CD90.1<sup>+</sup> cells in the GFP<sup>+</sup>Sca-1<sup>+</sup> fraction was significantly higher than that of the GFP<sup>+</sup> Sca-1<sup>-</sup> fraction. The number of Flk-1<sup>+</sup> or CD31<sup>+</sup> or PDGFR $\beta$ <sup>+</sup> in the GFP<sup>+</sup>Sca-1<sup>+</sup> fraction was significantly higher than that of the GFP<sup>+</sup> Sca-1<sup>-</sup> fraction. N=6/group, Mean $\pm$ SD; p<0.05.

**Figure S3: Total number of WT1<sup>+</sup> Cells in the infarct hearts.** Sca-1<sup>+</sup> and Sca-1<sup>-</sup> bone marrow (BM, 2X10<sup>6</sup>) cells from young (Y) GFP (green fluorescent protein) transgenic mice were used to reconstitute irradiated old (O, 9.5 Gy) wild type mice, generating Y(Sca1<sup>+</sup>)-O and Y(Sca1<sup>-</sup>)-O

chimeras, respectively. Twelve weeks after BM reconstitution, coronary occlusion was performed to induce myocardial infarction (MI). Quantification of WT1<sup>+</sup> (a specific marker for epicardial cells) cells in the infarct region (from all three layers of heart in the infarct zone) of the Y(Sca1<sup>+</sup>)-O and the Y(Sca1<sup>-</sup>)-O chimeric hearts at 3 and 7 days post-MI. The total number of WT1<sup>+</sup> cells in the infarct region of the Y(Sca1<sup>+</sup>)-O chimeric hearts was significantly higher than that in Y(Sca1<sup>-</sup>)-O chimeric hearts at 3 days post-MI. n= 6/group, Mean±SD; \*\*P<0.01. WT1: wilms tumor 1.

**Figure S4: BM Sca-1<sup>+</sup> cells activated EMT of epicardial cells after MI.** Bone marrow (BM, 2X10<sup>6</sup>) Sca-1<sup>+</sup> and Sca-1<sup>-</sup> cells from young (Y) GFP (green fluorescent protein) transgenic mice were used to reconstitute irradiated old (O, 9.5 Gy) wild type mice, generating Y(Sca1<sup>+</sup>)-O and Y (Sca1<sup>-</sup>)-O chimeras, respectively. Twelve weeks after BM reconstitution, coronary occlusion was performed to induce myocardial infarction (MI). **(A)** Immunofluorescent staining of smooth muscle actin (SMA), Vimentin and Calponin at 3 days post-MI. Yellow arrows indicate GFP, WT1, and SMA or Vimentin or Calponin triple-positive cells (Donor-derived epicardial cell obtained the mesenchymal phenotype). White arrows indicate WT1 and SMA or Vimentin or Calponin double-positive cells (host-derived epicardial cell obtained the mesenchymal phenotype). **(B)** Quantification of WT1 and SMA or Vimentin or Calponin double-positive cells (host-derived epicardial cell obtained the mesenchymal phenotype) and GFP, WT1, and SMA or Vimentin or Calponin triple-positive cells (Donor-derived epicardial cell obtained the mesenchymal phenotype) in the infarct region of the hearts. n=6/group, Mean±SD; \*\*P<0.01. EMT: epithelial-to-mesenchymal transition.

**Figure S5. Differential gene expression in bone marrow Sca-1<sup>+</sup> cells and Sca-1<sup>-</sup> cells under normoxia and hypoxia conditions.** Bone marrow (BM) Sca-1<sup>+</sup> and Sca-1<sup>-</sup> cells were isolated from young (Y) GFP (green fluorescent protein) transgenic mice and subjected to normoxia and hypoxia (0.1% O<sub>2</sub>) conditions for 72 h. Differential gene expression were determined by RT-qPCR. n=6/group, Mean±SD; \*P<0.05, \*\*P<0.01.

**Figure S6: Reconstitution of Sca-1 KO mice with WT BM Sca-1<sup>+</sup> cells restored EMT response after MI.** Sca-1 knock-out (KO) mice were reconstituted with wild type (WT) bone marrow (BM) Sca-1<sup>+</sup> cells [2X10<sup>6</sup>, (Sca-1<sup>+</sup>)-KO] for 3 months, then underwent myocardial infarction (MI). **(A)** Immunofluorescent staining of smooth muscle actin (SMA), Vimentin, and Calponin at the infarct region of WT, Sca-1 KO and (Sca-1<sup>+</sup>)-KO hearts at 3 days post-MI. **(B)** Quantification of WT1<sup>+</sup>SMA<sup>+</sup>, WT1<sup>+</sup>Vimentin<sup>+</sup> and WT1<sup>+</sup>Calponin<sup>+</sup> cell out of total cell number (DAPI<sup>+</sup>) in the infarct region of WT, Sca-1 KO and (Sca-1<sup>+</sup>)-KO hearts at 3 days post-MI. n=6/group; Mean±SD; \* vs WT, P<0.01, # vs KO P<0.05. EMT: epithelial-to-mesenchymal transition.

## Supplemental Figures

Figure S1

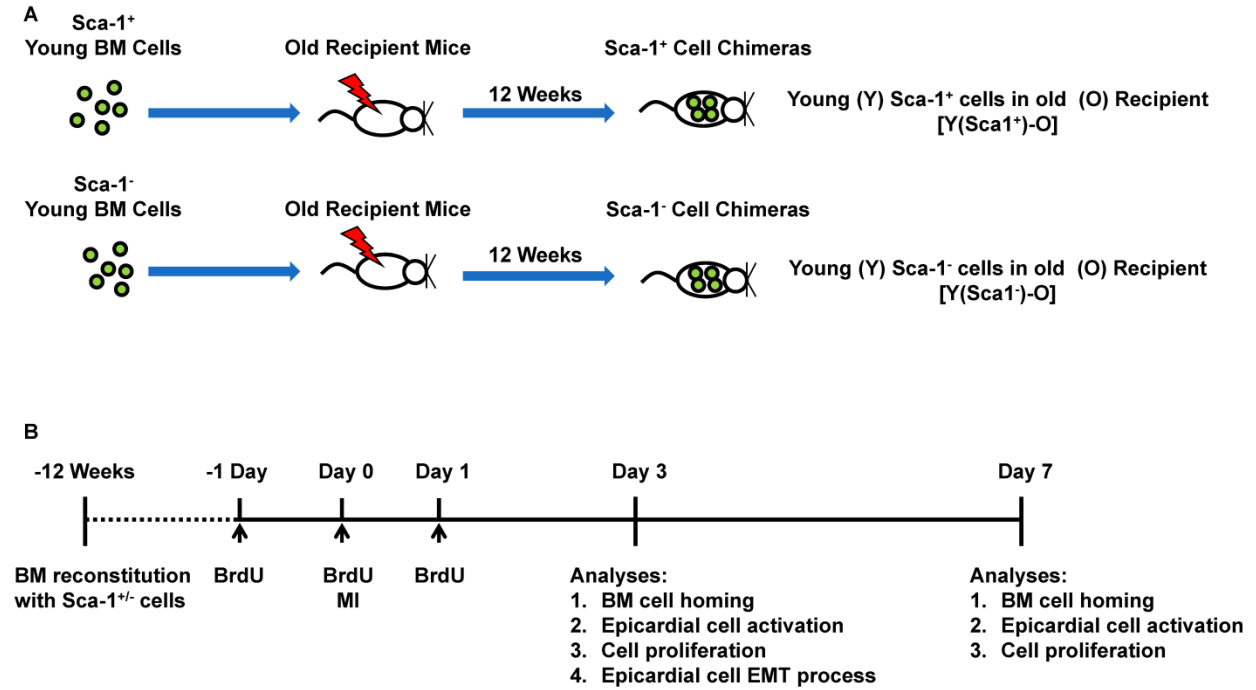

Figure S2

A

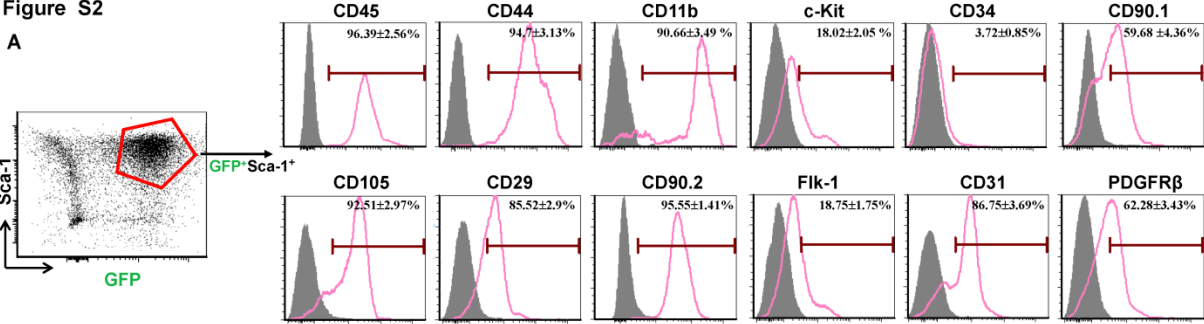

B

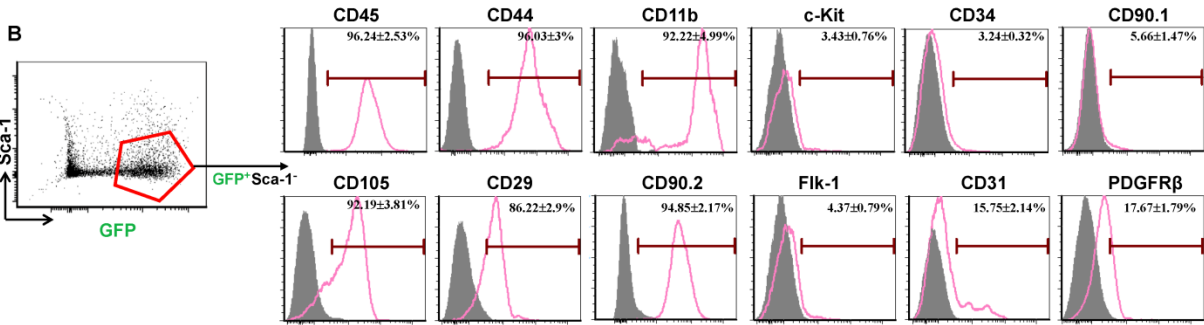

Figure S3

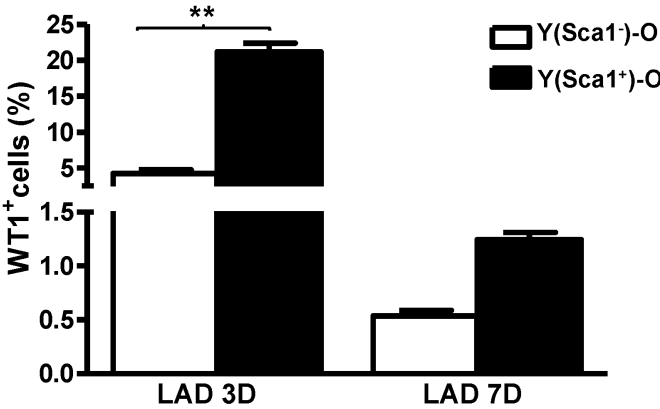

Figure S4

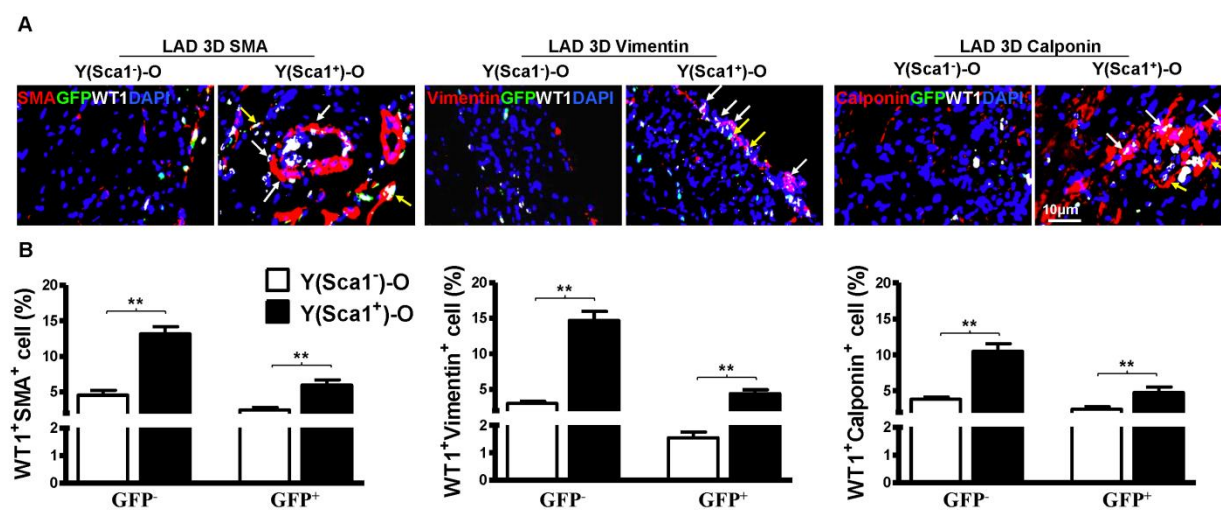

Figure S5

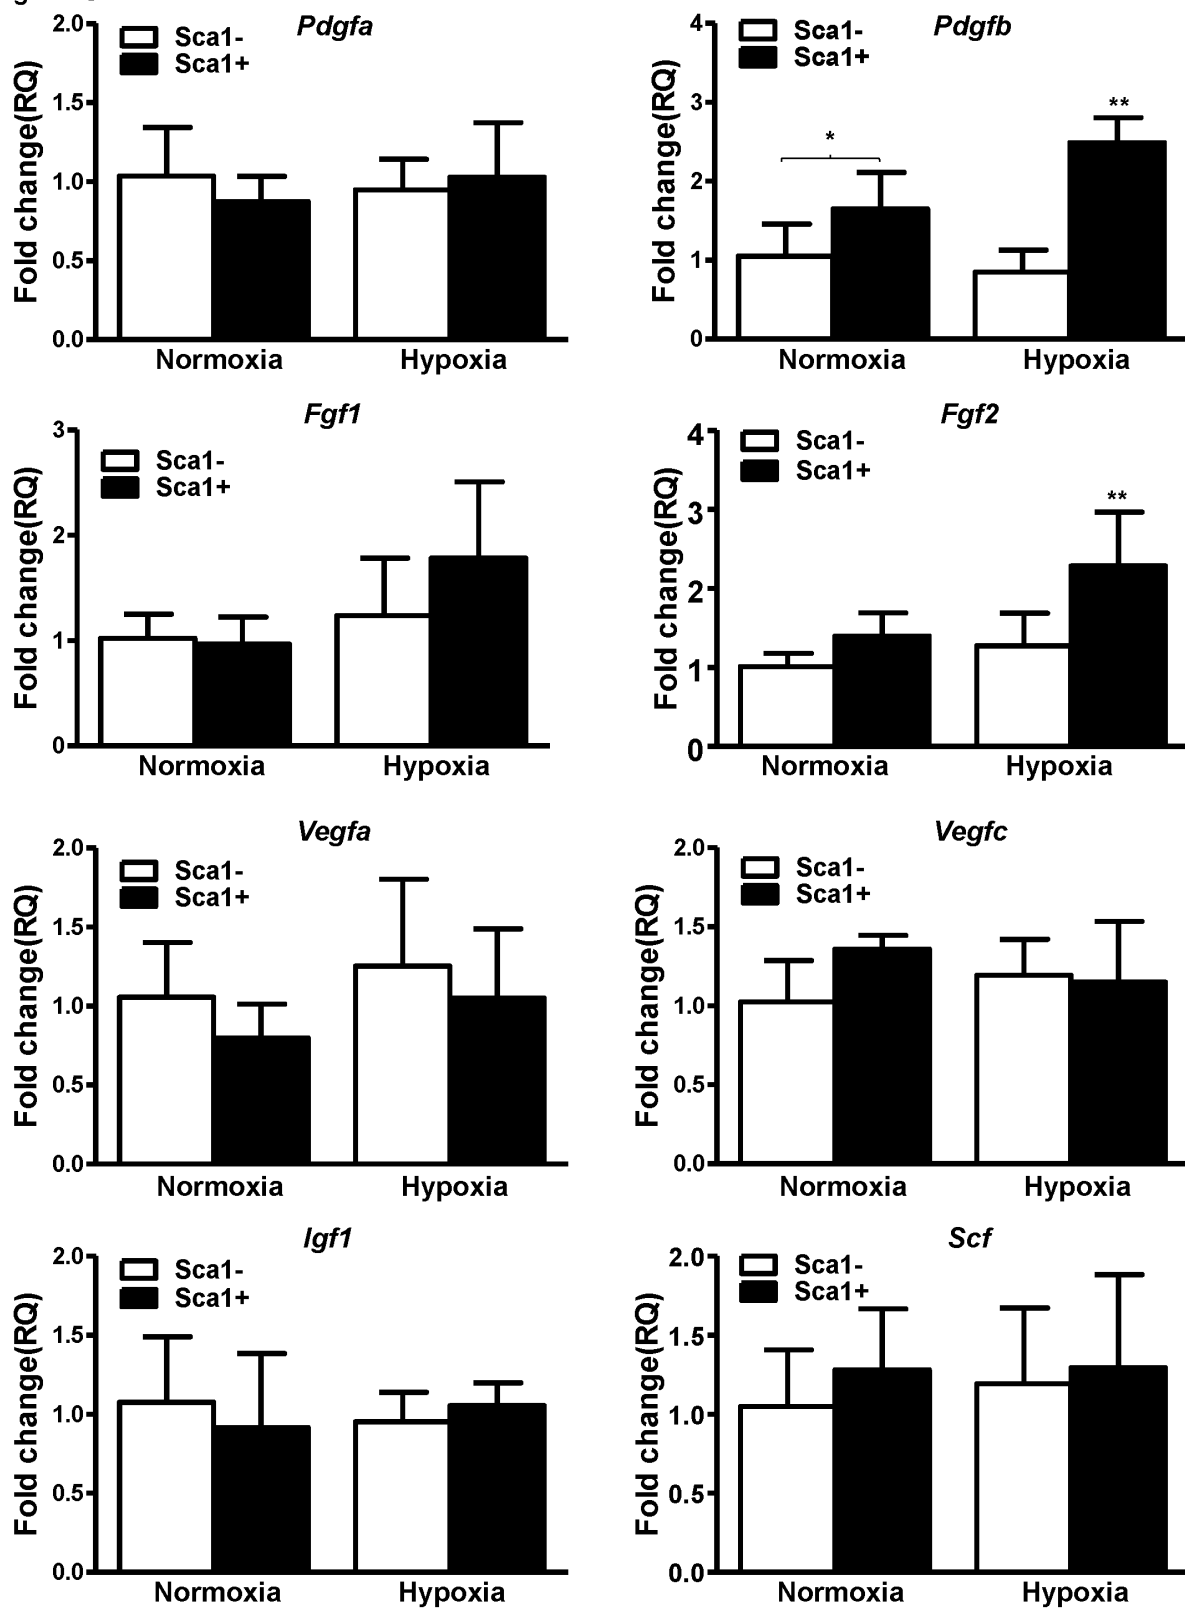

Figure S6

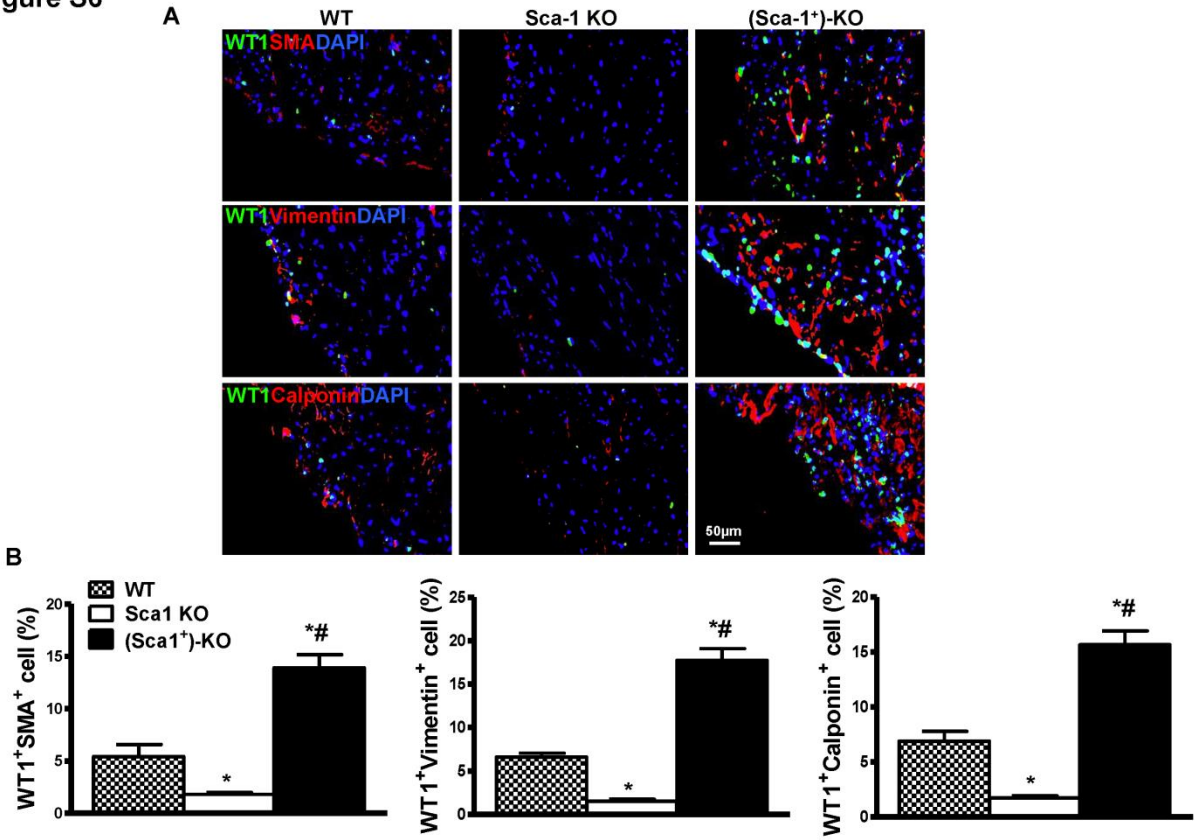

### **Supplemental References**

1. Ito CY, Li CYJ, Bernstein A, Dick JE, Stanford WL. Hematopoietic stem cell and progenitor defects in Sca-1/Ly-6A-null mice. *Blood*. 2003 Jan 15;101(2):517–23.
2. Winter EM, Grauss RW, Hogers B, van Tuyn J, van der Geest R, Lie-Venema H, et al. Preservation of left ventricular function and attenuation of remodeling after transplantation of human epicardium-derived cells into the infarcted mouse heart. *Circulation*. 2007 Aug 21;116(8):917–27.
3. Winter EM, van Oorschot AAM, Hogers B, van der Graaf LM, Doevendans PA, Poelmann RE, et al. A new direction for cardiac regeneration therapy: application of synergistically acting epicardium-derived cells and cardiomyocyte progenitor cells. *Circ Heart Fail*. 2009 Nov;2(6):643–53.
